# Supplementary material
Source: PubMed Central journal article supplement (PMC3811319)
Supplement: AAC.01433-13_zac011132300so1.pdf [file AAC.01433-13_zac011132300so1.pdf]

## SUPPLEMENTAL MATERIAL

TABLE S1. Primers used in this study

| Description                                         | Primer name           | Sequence (5' to 3') <sup>a</sup> | Position             | Reference |
|-----------------------------------------------------|-----------------------|----------------------------------|----------------------|-----------|
| 1 <sup>st</sup> LA PCR for <i>fusB</i>              |                       | GAGAAATTTCTAAT                   | <i>fusB</i> 437–465  | 1         |
| XbaI-digested fragments of                          | 437–465F <sup>b</sup> | CAGGTTGTAAAGGG                   |                      |           |
|                                                     |                       | G                                |                      |           |
| SeRI <sub><i>fusB</i>-3692</sub> and <i>fusB</i>    |                       | AAGTTTTTGCGGAC                   | <i>fusB</i> 282–253  |           |
| SeRI <sub><i>fusB</i>-85</sub>                      | 282–253R <sup>b</sup> | TAGGTAGTTCAAAA                   |                      |           |
|                                                     |                       | GG                               |                      |           |
| 2 <sup>nd</sup> LA PCR for <i>fusB</i>              |                       | GGTGACTATATATG                   | <i>fusB</i> 553–580F |           |
| XbaI-digested fragments of                          | 553–580F <sup>c</sup> | TCGAGATAGCATTC                   |                      |           |
|                                                     | <i>fusB</i> 221–192   | GCTTCAATTTCTTTG                  | <i>fusB</i> 221–192  |           |
| SeRI <sub><i>fusB</i>-3692</sub> and R <sup>c</sup> |                       | TTTGATAATCTGATG                  |                      |           |
| cSePI <sub><i>fusB</i>-857</sub>                    |                       |                                  |                      |           |
| and inverse                                         |                       |                                  |                      |           |
| PCR for                                             |                       |                                  |                      |           |
| AclI-digested                                       |                       |                                  |                      |           |

fragments of

cSePI<sub>fusB-857</sub>

Inverse PCR 3692-EcoRI- GGAACGGATGATA *aj2* downstream This study

for LAF GTTACACC 102–122

PacI-digested 3692-PacI-IR CGATTGAATAACTT *fusB* 114–95

fragments of TGACGG

SeRI<sub>fusB-3692</sub>

Inverse PCR *fusB* TTCCGATTTGATGC *fusB* 389–361

for 389–361R<sup>d</sup> AAGTTCATTCCATC

BsmI-digested C

fragments of

SeRI<sub>fusB-3692</sub>

Detection of *S. epi* AAGATACAATTGAA *smpB* 74–92 This study

SeRI<sub>fusB-3692</sub> *ssrA*-binding GCGGG

upstream protein(F)

8-7 BsmI-UR TTCGTGCCTTACCTT SeRI<sub>fusB-3692</sub>

CTG

ORF13 -82\_-99

Inverse PCR *S. epi* inverse AGGTGCGAAGATTG SePI<sub>fusB-857</sub>  $\Delta$ *aj3* This study

|                          |                         |                 |                                     |
|--------------------------|-------------------------|-----------------|-------------------------------------|
| for Spe- and             | 1990–2007F              | CAGG            | 189–206                             |
| XbaI-digested            | S. epi inverse          | GTTTCACTCATCGC  | SePI <sub>fusB-857</sub> LP         |
| fragments of             | 21–1R                   | AACACAG         | -113_-133                           |
| SePI <sub>fusB-857</sub> |                         |                 |                                     |
| Inverse PCR              | S. epi                  | GGTATCTATTCAAG  | SePI <sub>fusB-857</sub> <i>tnp</i> |
| for                      | BclI–1F                 | AGGTATGG        | -18_4                               |
| BclI-digested            | S. epi                  | CATTTTTTAGTCACT | SePI <sub>fusB-857</sub> ORF8       |
| fragments of             | BclI–1R                 | TCACGG          | 494–474                             |
| SePI <sub>fusB-857</sub> |                         |                 |                                     |
| Inverse PCR              | S. epi                  | TCGTAACTTTATC   | SePI <sub>fusB-857</sub>            |
| for                      | hindIII–3F <sup>e</sup> | CACCCG          | ORF17 -246_-227                     |
| PacI-digested            |                         |                 |                                     |
| fragments of             |                         |                 |                                     |
| SePI <sub>fusB-857</sub> |                         |                 |                                     |
| Detection of             | S.epi                   | ATACGTTGTGTGAA  | SePI <sub>fusB-857</sub> ORF7       |
| SeRI <sub>fusB-857</sub> | BclI–2R <sup>f</sup>    | ATACCC          | 357–338                             |
| Upstream and             |                         |                 |                                     |
| downstream               |                         |                 |                                     |

|              |               |                |                          |            |
|--------------|---------------|----------------|--------------------------|------------|
|              | S.epi PacI-3F | CATTTATATGGGCT | SePI <sub>fusB-857</sub> | This study |
|              |               | ATGCTGG        | ORF20 -7_14              |            |
|              | S.epi sodium  | TCTCACTATGGATT | SePI <sub>fusB-857</sub> |            |
|              | transporter   | TAACTTCCG      | ORF24                    |            |
|              |               | 1146-1168F     | 1146-1168                |            |
| Detection of | VapE 93F      | WTCWGCYACWACA  | vapE 93-110              | This study |
| <i>vapE</i>  |               | CAAGC          |                          |            |
|              | VapE 1246R    | GCCATACATAAGCA | vapE 1246-1228           |            |
|              |               | CCTGG          |                          |            |

---

<sup>a</sup> K = G or T, and Y = C or T.

<sup>b</sup>Each of the two primers were paired with C1 provided by LA-PCR in vitro cloning kit (Takara Shuzo Co. Ltd., Japan) for the first LA PCR.

<sup>b</sup>Each of the the two primers were paired with C2 provided by LA-PCR in vitro cloning kit (Takara Shuzo Co. Ltd., Japan) for the nested LA PCR.

<sup>d</sup>The primer was paired with fusB 437-465F.

<sup>c</sup>The primer was paired with fusB 282-253R.

<sup>f</sup>The primer was paired with S.epi ssrA-binding protein(F) for upstream detection.

## 1 REFERENCES

- 2 1. **Chen HJ, Tsai JC, Hung WC, Tseng SP, Hsueh PR, Teng LJ.** 2011.  
3 Identification of *fusB*-mediated fusidic acid resistance islands in *Staphylococcus*  
4 *epidermidis* isolates. *Antimicrob. Agents Chemother.* **55**:5842-5849.
